# Supplementary material for: Flavonoids as Antiviral Agents for Enterovirus A71 (EV-A71)
Source: PubMed Central journal article supplement (PMC7077323; doi:10.3390/v12020184), 2020-02-06

Supplementary Table S1: Molecular structures of antiviral flavonoids

| Flavonoid                      | Structure                                                                                                                                                                                                                                                                                                                                                                           |
|--------------------------------|-------------------------------------------------------------------------------------------------------------------------------------------------------------------------------------------------------------------------------------------------------------------------------------------------------------------------------------------------------------------------------------|
| Apigenin                       | 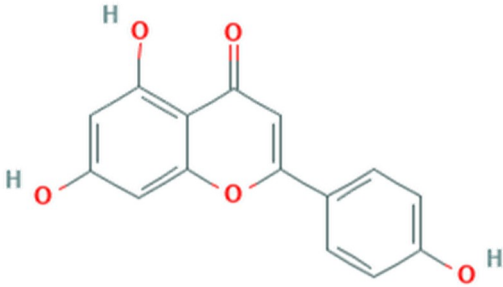 <p>The structure shows the flavone skeleton of apigenin. It consists of a chromone core (a benzene ring fused to a pyrone ring) with a 4-hydroxyphenyl group attached at the 7-position. The hydroxyl groups are explicitly shown with their hydrogen atoms.</p>                                 |
| Baicalin                       |  <p>The structure shows the flavone glycoside baicalin. It features a baicalein core (7,8-dihydroxyflavone with a 4-phenyl group) linked via a glycosidic bond to a glucose molecule. The glucose is shown in its cyclic pyranose form with stereochemistry indicated by wedges and dashes.</p>  |
| Baicalein                      |  <p>The structure shows the flavone baicalein. It consists of a chromone core with hydroxyl groups at the 5 and 7 positions and a 4-phenyl group at the 7-position. The hydroxyl groups are explicitly shown with their hydrogen atoms.</p>                                                     |
| 6-Chloro-4'-oxazolinyflavanone |  <p>The structure shows a flavanone derivative. It has a flavanone core with a substituent 'R' at the 6-position and a 4'-oxazoliny group at the 7-position. The oxazoline ring is a five-membered ring containing one nitrogen and one oxygen atom.</p> <p style="text-align: right;">R=Cl</p> |

**Chrysosplenol C**

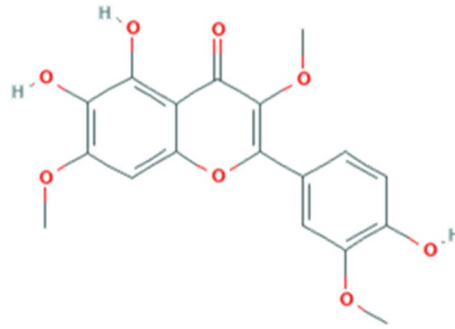

**Desmanthin-1**

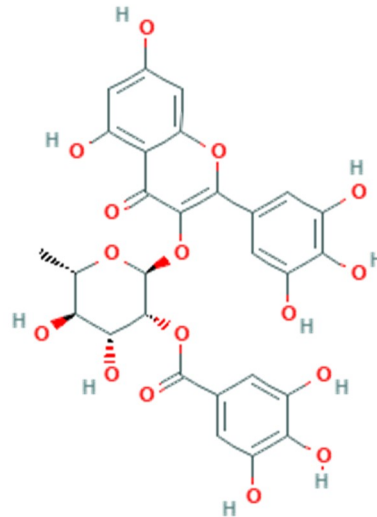

**Dihydroquercetin**

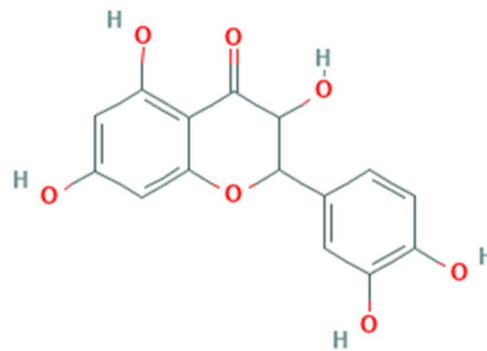

**5,3'-Dihydroxy-3,6,7,8,4'-  
pentamethoxyflavone**

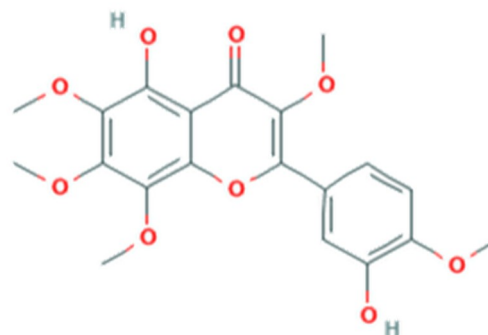

7,4'-Di-O-galloyltricitifavan

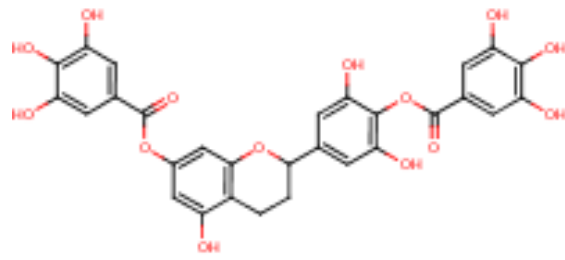

Epigallocatechin (ECG)

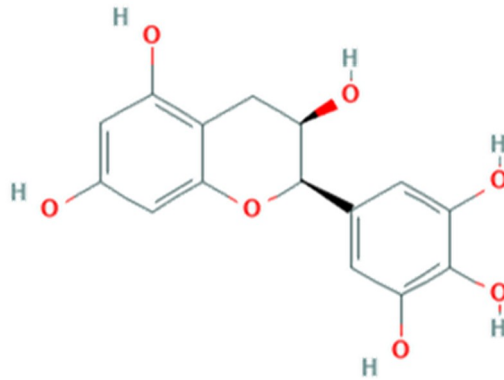

Epigallocatechin gallate (EGGC)

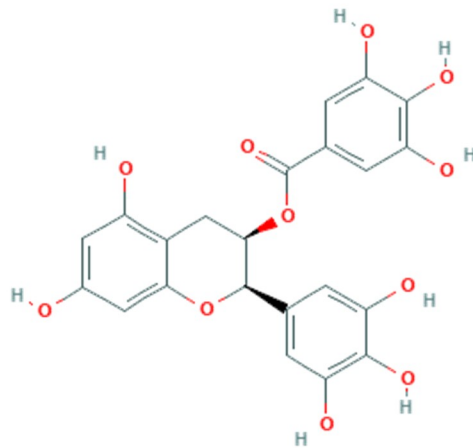

Eupafolin

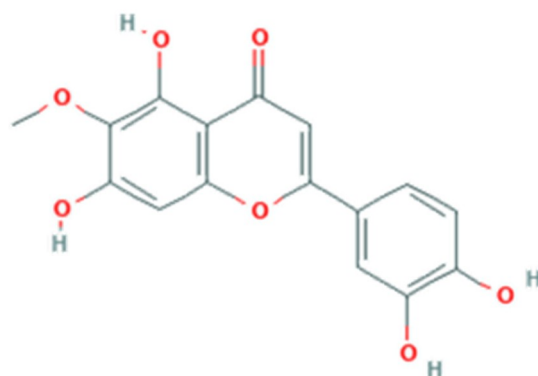

**Fisetin**

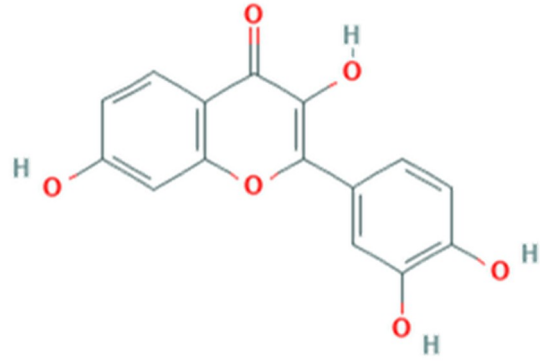

**Genistein**

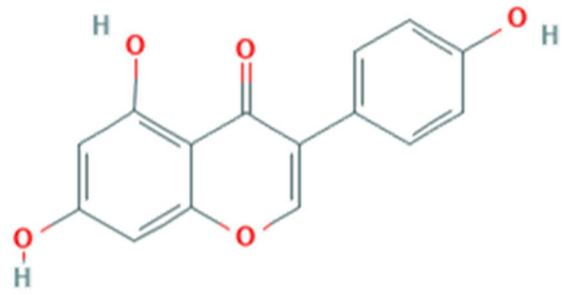

**Ginkgetin**

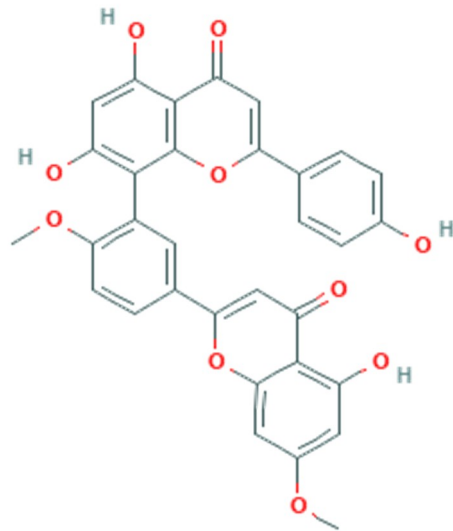

**5-hydroxy-3,6,7,3',4'-  
pentamethoxyflavone**

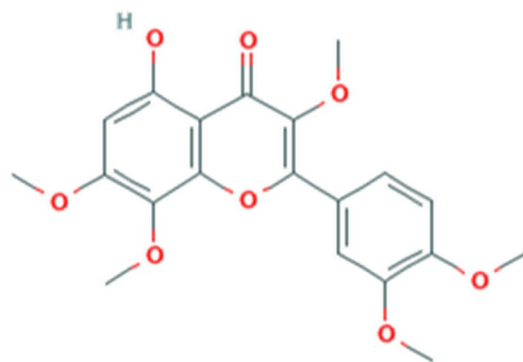

Isoscutellarein

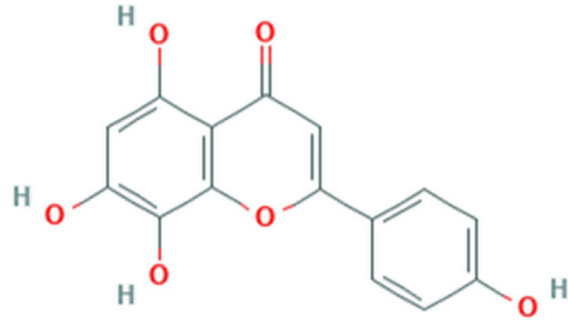

Kaempferol

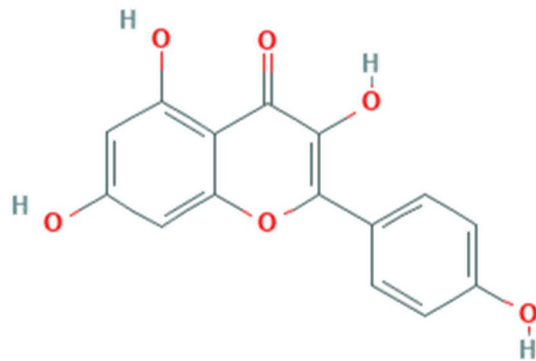

Kaempferol-3-O-[2'',6''-di-O-Z-p-coumaroyl]-β-D-glucopyranoside

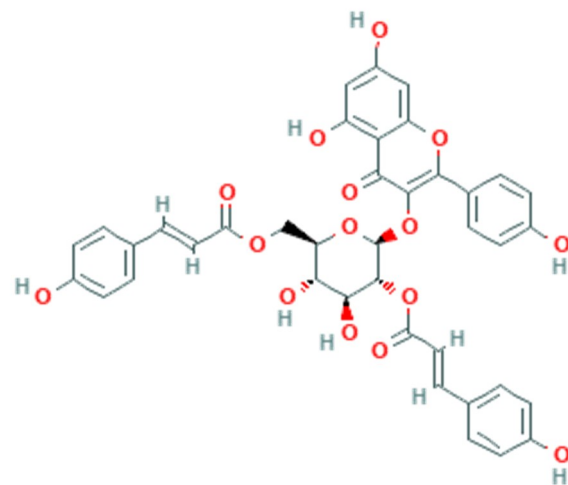

Luteolin

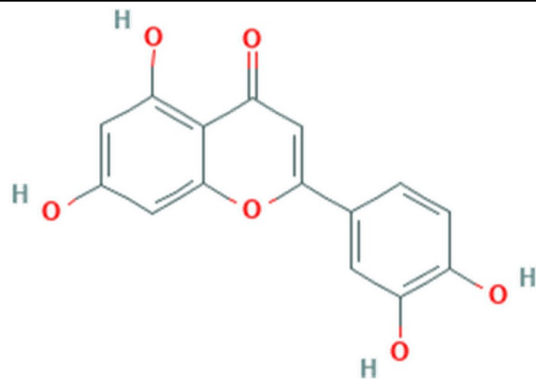

**Methoxyflavone**

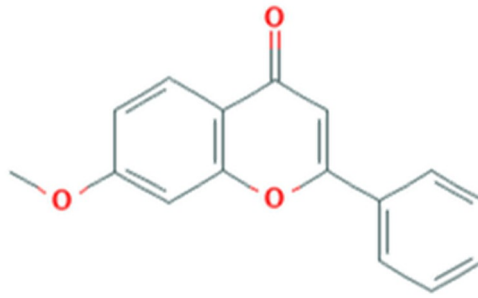

**8-Methoxy-isoscutellarein**

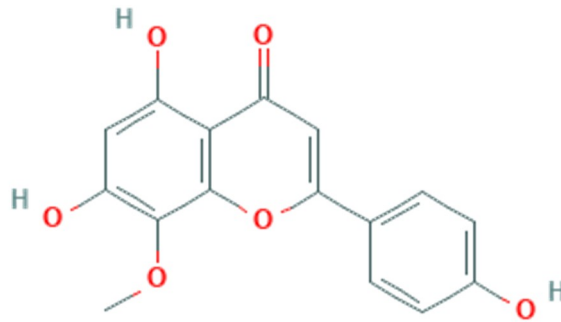

**3-Methylkaempferol**

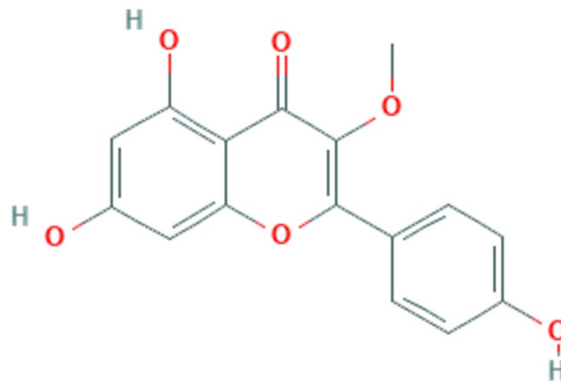

**3-Methylquercetin**

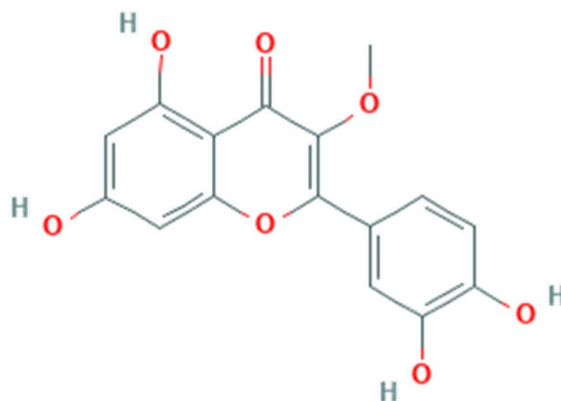

Myricitrin

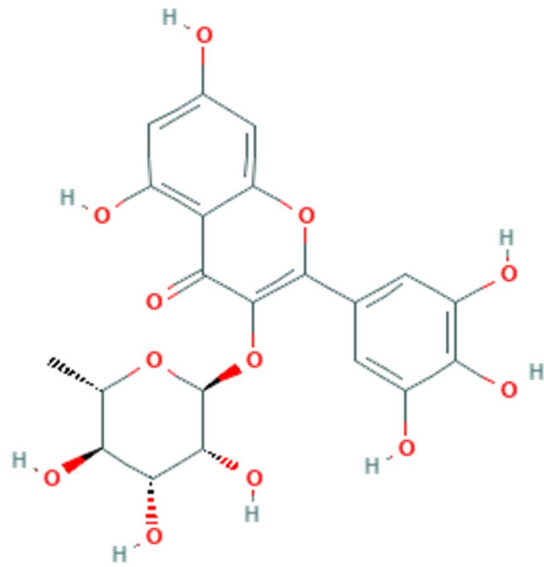

Naringenin

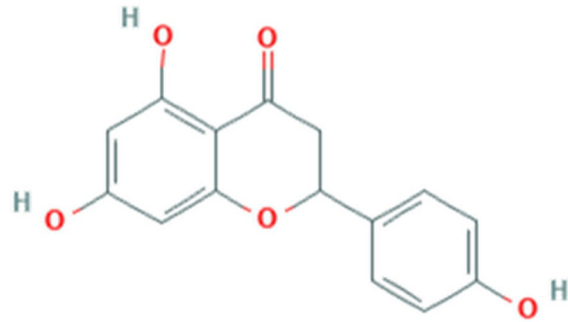

7-O-galloyltricetifavan

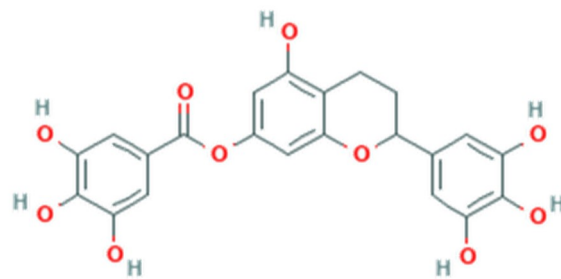

Pachypodol (RO 09-0179)

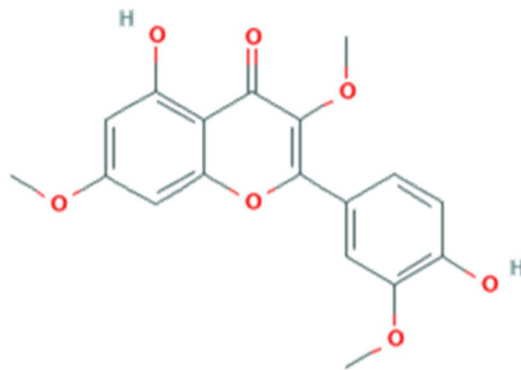

Prunin

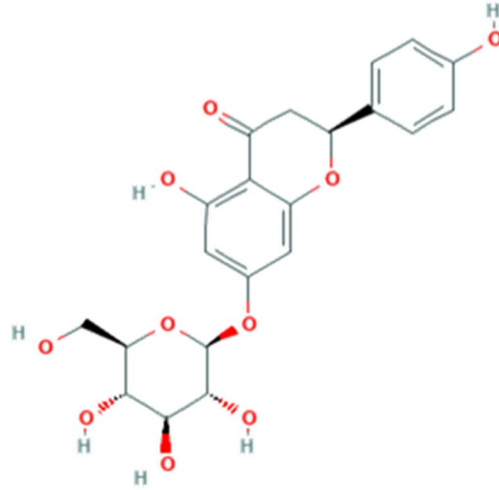

Quercetin

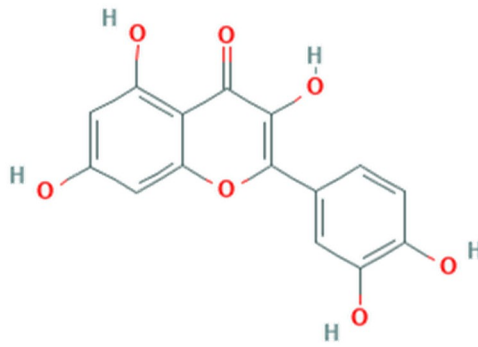

Quercetin 3- $\beta$ -O-D-glucoside

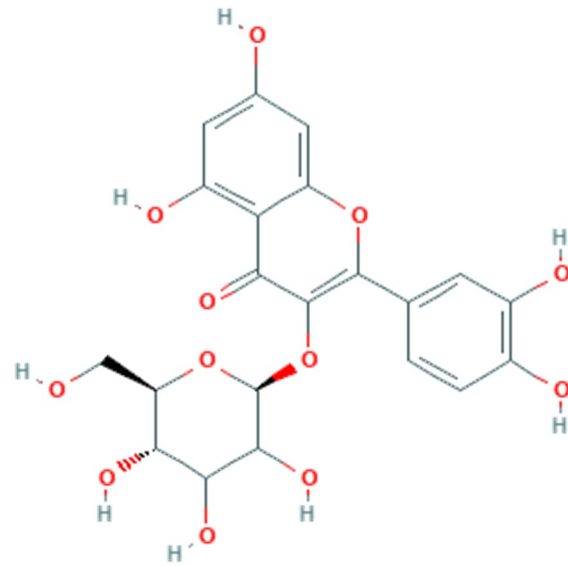



Quercitrin

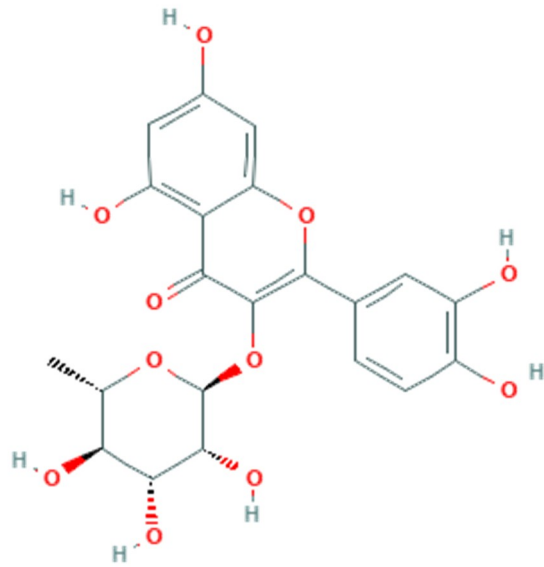

RO 09-0298

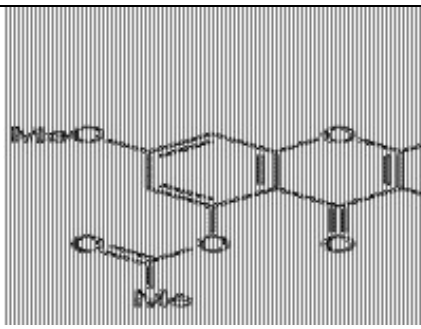

Rutin

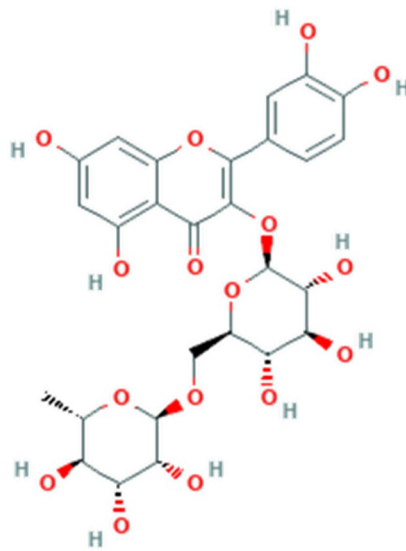

Sakuranetin

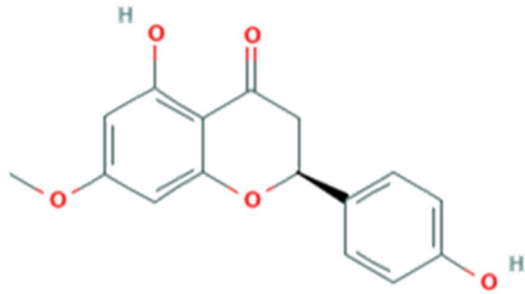

Silibinin

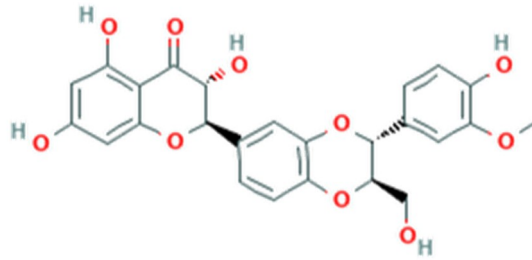

Silymarin

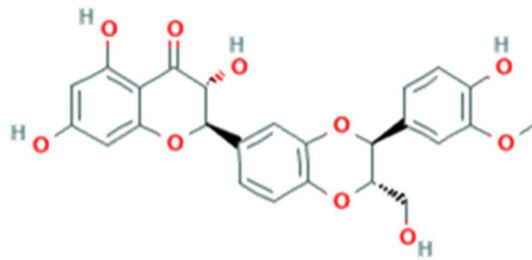

5,7,4'-Trihydroxy-3'-methoxyflavone

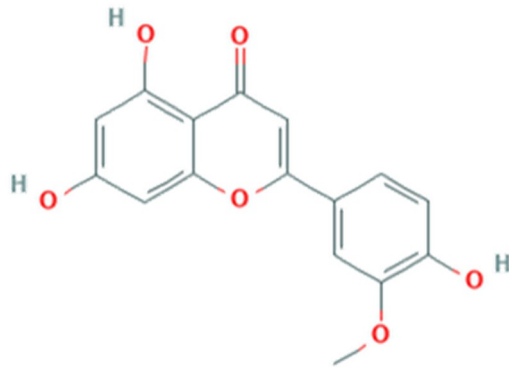

Tetra-O-methyl quercetin

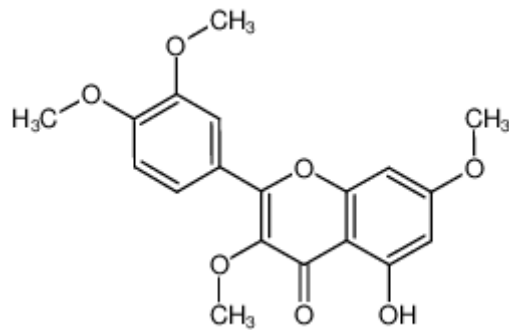

Supplement: viruses-12-00184-s001.pdf [file viruses-12-00184-s001.pdf]
